# Supplementary material
Source: PubMed Central journal article supplement (PMC6434588)
Supplement: Supp_Fig2.pdf [file Supp_Fig2.pdf]

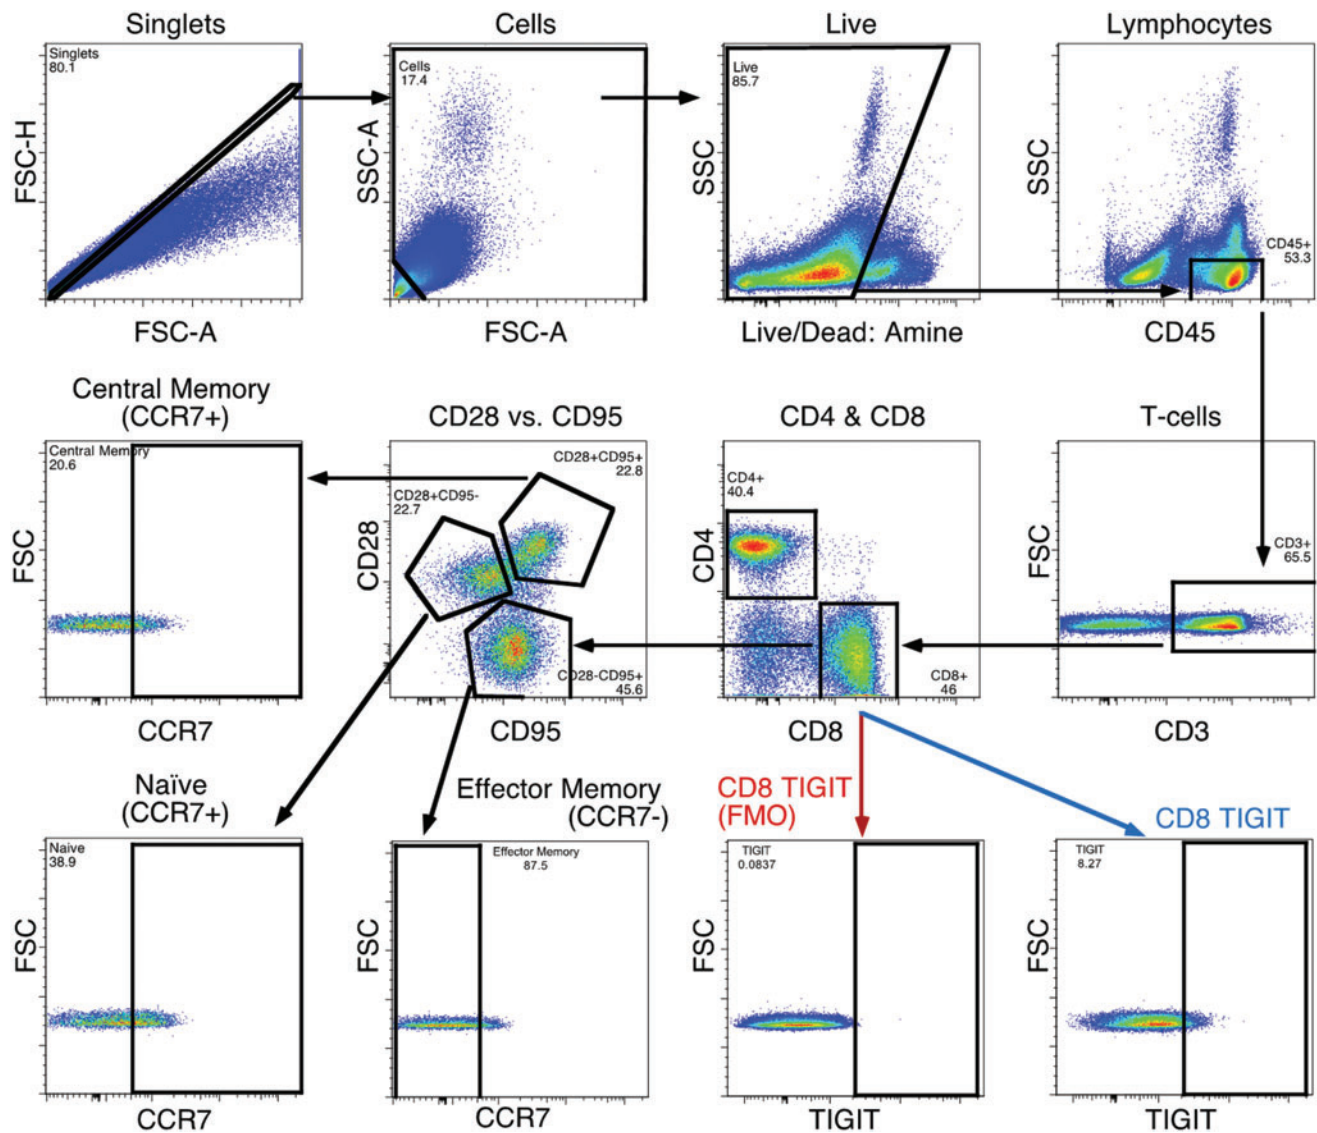

**SUPPLEMENTARY FIG. S2.** Gating strategy used for TIGIT and memory CD4 T cells. Representative gating strategy in PBMC to identify CM and TIGIT<sup>+</sup> T cells. Cells were identified by excluding doublets, gating on live cells, CD45<sup>+</sup> cells, and CD3<sup>+</sup> T cells followed by subsequent gating for individual CD4 and CD8 T cell subsets. Naïve (CD95<sup>+</sup>CD28<sup>+</sup>CCR7<sup>+</sup>), central memory (CD95<sup>+</sup>CD28<sup>+</sup>CCR7<sup>+</sup>), and effector memory (CD95<sup>+</sup>CD28<sup>-</sup>CCR7<sup>-</sup>) T cell subsets were identified. TIGIT<sup>+</sup> T cells were identified based on an FMO gate. CM, central memory; FMO, fluorescence minus one; PBMC, peripheral blood mononuclear cell.
