# Supplementary material
Source: PubMed Central journal article supplement (PMC6434588)
Supplement: Supp_Fig3.pdf [file Supp_Fig3.pdf]

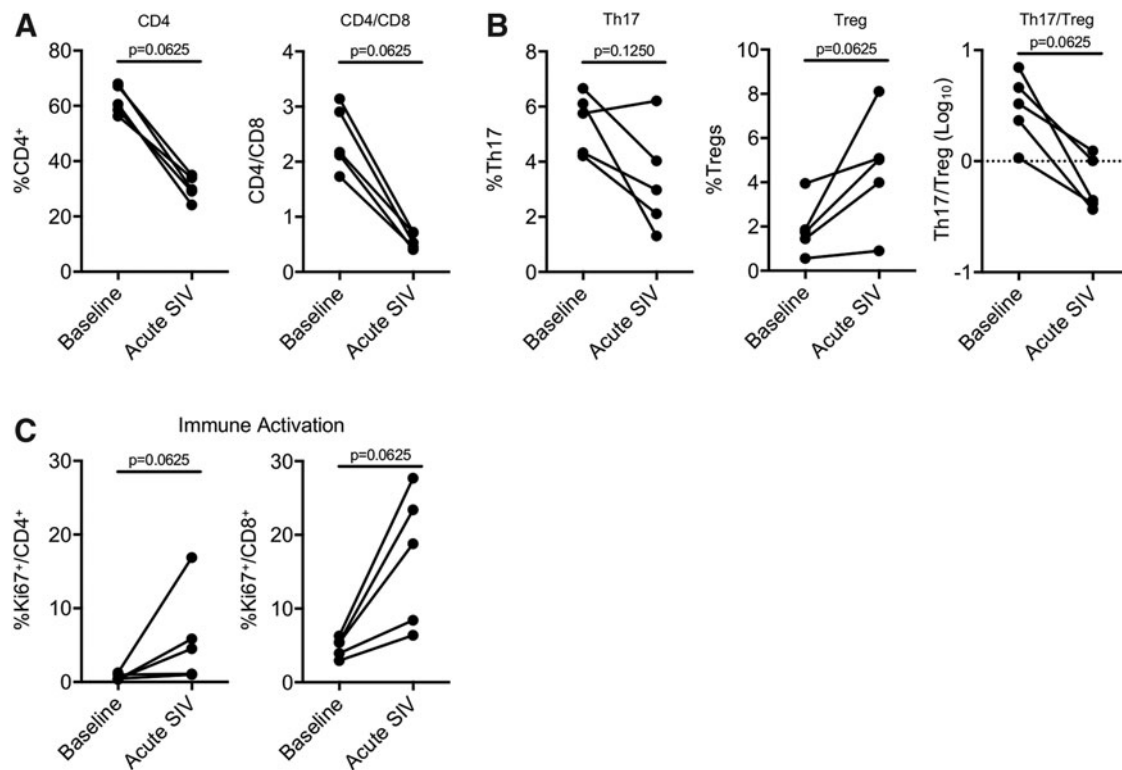

**SUPPLEMENTARY FIG. S3** CD4 T cell kinetics and immune activation in the PBMCs. Parameters measured at baseline (−4 wpi) and after acute SIV infection (6 wpi) in the PBMC were determined by flow cytometry. **(A)** CD4<sup>+</sup> of CD45<sup>+</sup> T cells (*left panel*) and CD4/CD8 ratio (ratio). **(B)** Th17 (IL-17<sup>+</sup>) (*left panel*) or Tregs (FoxP3<sup>+</sup>CD25<sup>+</sup>) (*center panel*) of CD4<sup>+</sup> T cells and log<sub>10</sub> Th17/Treg ratio (*right panel*) in the PBMC were determined as described in Figure 1. The *dotted line* (1) indicates equilibrium of Th17 and Treg cells. **(C)** Frequencies of activated (Ki67<sup>+</sup>) of CD4<sup>+</sup> (*left panel*) or CD8<sup>+</sup> T cells (*right panel*) in the PBMC. **(A–C)** Dots represent individual animals (*N*=5). *p*-Values were determined using paired Wilcoxon tests, with *p*-values ≤0.05 considered significant. SIV, simian immunodeficiency virus.
