# Supplementary material
Source: PubMed Central journal article supplement (PMC6434588)
Supplement: Supp_Fig4.pdf [file Supp_Fig4.pdf]

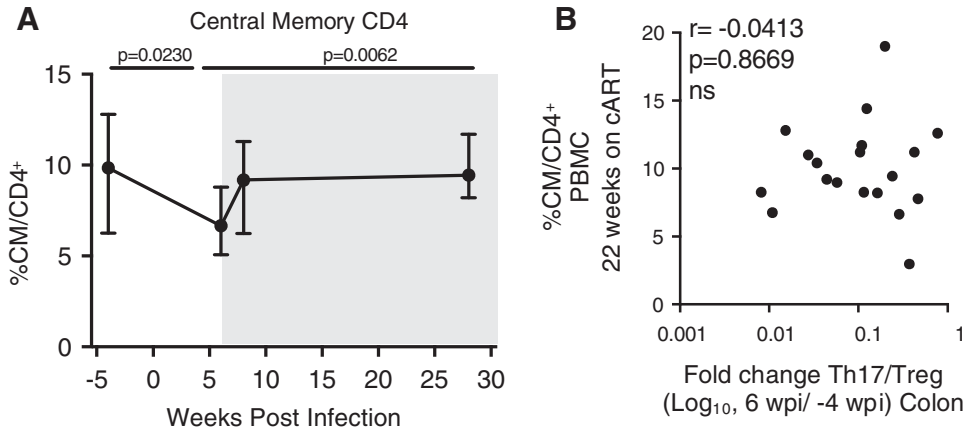

**SUPPLEMENTARY FIG. S4.** Levels of CM CD4<sup>+</sup> T cells in PBMCs. **(A)** The frequencies of CM (CD95<sup>+</sup>CD28<sup>+</sup>) CD4<sup>+</sup> T cells in the PBMCs were measured by flow cytometry **(B)** Correlations between log<sub>10</sub>-fold change in Th17/Treg ratios during acute infection as compared to preinfection levels (6 wpi/-4 wpi) versus CM CD4<sup>+</sup> T cell frequencies in PBMC after 22 weeks on cART. cART, combination antiretroviral therapy. CM, central memory.
