# Supplementary material
Source: PubMed Central journal article supplement (PMC6434588)
Supplement: Supp_Fig5.pdf [file Supp_Fig5.pdf]

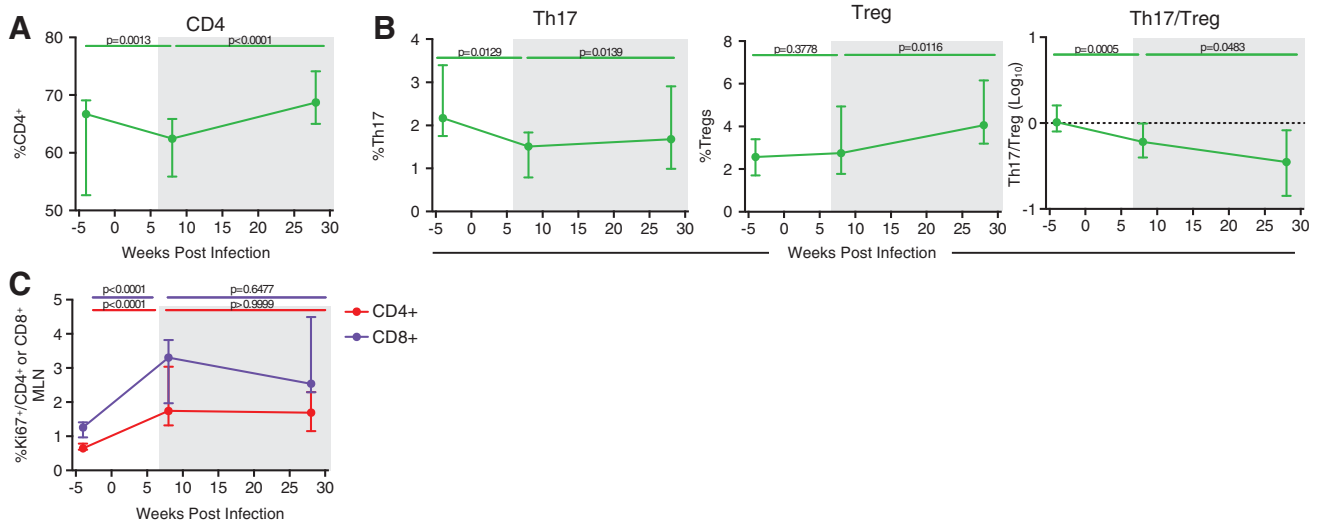

**SUPPLEMENTARY FIG. S5.** CD4 T cell kinetics and immune activation in the mesenteric LN. Frequencies of CD4<sup>+</sup> T cells, Th17 and Treg subsets, and Th17/Treg ratios in the MLN were determined by flow cytometry. **(A)** CD4<sup>+</sup> of CD45<sup>+</sup> T cells in the MLN. **(B)** Th17 (IL-17<sup>+</sup>) (*left panel*) or Tregs (FoxP3<sup>+</sup>CD25<sup>+</sup>) (*center panel*) of CD4<sup>+</sup> T cells and log<sub>10</sub> Th17/Treg ratio (*right panel*) in the MLN were determined as described in Figure 1. The dotted line (1) indicates equilibrium of Th17 and Treg cells. **(C)** Frequencies of activated (Ki67<sup>+</sup>) CD4<sup>+</sup> (*red lines*) or CD8<sup>+</sup> T cells (*purple lines*) in the MLN. **(A–C)** Shown are medians with interquartile ranges ( $N=19$ ). Shaded regions indicate periods of cART treatment.  $p$ -Values were determined using paired Wilcoxon tests, with  $p$ -values  $\leq 0.05$  considered significant. MLN, mesenteric lymph nodes.
