# Supplementary material
Source: PubMed Central journal article supplement (PMC6434588)
Supplement: Supp_Table1.pdf [file Supp_Table1.pdf]

SUPPLEMENTARY TABLE S1. FLOW CYTOMETRY PANEL FOR GUT HOMEOSTASIS

| <i>Antibody</i> | <i>Fluorochrome</i>   | <i>Clone</i> | <i>Amount used (μL/sample)</i> | <i>Catalog no.</i> | <i>Company</i> |
|-----------------|-----------------------|--------------|--------------------------------|--------------------|----------------|
| FoxP3           | Alexa Fluor® 647      | 206D         | 5                              | 320114             | BioLegend      |
| IL-2            | Alexa Fluor® 700      | MQ1-17H12    | 2                              | 500320             | BioLegend      |
| CD4             | Brilliant Violet 605™ | OKT4         | 2.5                            | 317438             | BioLegend      |
| CD8a            | Brilliant Violet 785™ | RPA-T8       | 2.5                            | 301046             | BioLegend      |
| IFN-γ           | FITC                  | B27          | 20                             | 552887             | BD Biosciences |
| CD25            | BV421                 | M-A251       | 5                              | 562442             | BD Biosciences |
| CD3             | BV650                 | SP34-2       | 2.5                            | 563916             | BD Biosciences |
| Ki-67           | BV711                 | B56          | 5                              | 563755             | BD Biosciences |
| CD45            | PE-CF594              | D058-1283    | 2.5                            | 562394             | BD Biosciences |
| TNFα            | Pe-Cy™7               | Mab11        | 5                              | 557647             | BD Biosciences |
| IL-17A          | PE                    | eBio64CAP17  | 6                              | 12-7178-42         | eBioscience    |
| CD107a          | PE-Cyanine5           | eBioH4A3     | 5                              | 15-1079-42         | eBioscience    |
| IL-22           | PerCP-eFluor 710      | IL22J0P      | 1                              | 46-7222-82         | eBioscience    |
| LIVE/DEAD™      | Aqua                  | —            | 1.5                            | L34957             | Invitrogen     |
