# Supplementary material
Source: PubMed Central journal article supplement (PMC6434588)
Supplement: Supp_Table2.pdf [file Supp_Table2.pdf]

SUPPLEMENTARY TABLE S2. FLOW CYTOMETRY PANEL FOR TIGIT STAINING

| <i>Antibody</i> | <i>Fluorochrome</i>        | <i>Clone</i> | <i>Amount used (μL/sample)</i> | <i>Catalog no.</i> | <i>Company</i> |
|-----------------|----------------------------|--------------|--------------------------------|--------------------|----------------|
| CD95            | BV421                      | DX2          | 5                              | 562616             | BD Biosciences |
| CD3             | BV711                      | SP34-2       | 2.5                            | 740807             | BD Biosciences |
| CCR7            | BV786                      | 3D12         | 5                              | 563710             | BD Biosciences |
| CD4             | PerCP-Cy <sup>TM</sup> 5.5 | L200         | 10                             | 552838             | BD Biosciences |
| CD28            | PE-CF594                   | CD28.2       | 5                              | 562296             | BD Biosciences |
| CD45            | Alexa Fluor 700            | D058-1283    | 5                              | 561288             | BD Biosciences |
| CD8a            | Pe-Cy7                     | RPA-T8       | 2.5                            | 557760             | BD Biosciences |
| TIGIT           | PerCP-eFluor 710           | MBSA43       | 5                              | 46-9500-42         | eBioscience    |
| LIVE/DEAD       | Aqua                       | —            | 1.5                            | L34957             | Invitrogen     |
