# Supplementary material
Source: PubMed Central journal article supplement (PMC6434588)
Supplement: Supp_Table3.pdf [file Supp_Table3.pdf]

SUPPLEMENTARY TABLE S3. IMMUNOLOGICAL AND VIROLOGICAL PARAMETERS EVALUATED IN SIMIAN IMMUNODEFICIENCY VIRUS-INFECTED, COMBINATION ANTIRETROVIRAL THERAPY-TREATED MACAQUES

|                                              | <i>Medians with IQR</i>     |                                                                             |                    |                    | <i>p<sup>a</sup></i>                                        |                                                                |                                                           |
|----------------------------------------------|-----------------------------|-----------------------------------------------------------------------------|--------------------|--------------------|-------------------------------------------------------------|----------------------------------------------------------------|-----------------------------------------------------------|
|                                              | <i>Baseline<sup>b</sup></i> | <i>Acute infection<sup>c</sup></i>                                          | <i>Post-cART 1</i> | <i>Post-cART 2</i> | <i>Baseline<sup>b</sup> vs. acute infection<sup>c</sup></i> | <i>Acute infection<sup>c</sup> vs. post-cART 1<sup>d</sup></i> | <i>Post-ART 1<sup>d</sup> vs. post-cART 2<sup>e</sup></i> |
| <b>Plasma</b>                                |                             |                                                                             |                    |                    |                                                             |                                                                |                                                           |
| Viral load (copies/mL)                       | 30 (30–30)                  | 1.34 × 10 <sup>6</sup><br>(3.78 × 10 <sup>5</sup> –1.27 × 10 <sup>7</sup> ) | 161 (65–2,034)     | 68 (30–552)        | <0.0001                                                     | <0.0001                                                        | 0.0032                                                    |
| sCD14 (ng/mL)                                | 471 (381–616)               | 660 (533–760)                                                               | 606 (512–771)      | 763 (474–905)      | 0.0039                                                      | 0.0024                                                         | 0.0024                                                    |
| <b>Blood</b>                                 |                             |                                                                             |                    |                    |                                                             |                                                                |                                                           |
| CD3 <sup>+</sup> CD4 <sup>+</sup> (cells/μL) | 1,102 (975–1,372)           | 660 (520–901)                                                               | 1,010 (806–1,135)  | 958 (754–1,088)    | <0.0001                                                     | 0.0053                                                         | 0.8901                                                    |
| CD4/CD8 ratio                                | 1.7 (1.3–2.1)               | 1.0 (0.8–1.4)                                                               | 1.1 (0.9–1.7)      | 1.2 (1.0–1.5)      | <0.0001                                                     | 0.0033                                                         | 0.0024                                                    |
| <b>Colon</b>                                 |                             |                                                                             |                    |                    |                                                             |                                                                |                                                           |
| CD4 (%)                                      | 52.6 (42.3–61.2)            | 13.4 (6.8–19.2)                                                             | 21.9 (16–29.3)     | 36.3 (21.2–49.0)   | <0.0001                                                     | <0.0001                                                        | 0.0003                                                    |
| CD4/CD8 ratio                                | 1.5 (1.1–2.0)               | 0.2 (0.1–0.3)                                                               | 0.4 (0.3–0.6)      | 0.7 (0.5–1.1)      | <0.0001                                                     | <0.0001                                                        | 0.002                                                     |
| Th17 (%)                                     | 10.3 (7.5–16.1)             | 4.3 (1.8–10.2)                                                              | 5.0 (2.6–7.3)      | 4.6 (2.0–8.1)      | 0.0361                                                      | 0.8288                                                         | 0.5678                                                    |
| Treg (%)                                     | 2.3 (1.6–4.5)               | 12.0 (5.9–17.9)                                                             | 3.8 (3.4–5.5)      | 6.6 (4.3–11.5)     | <0.0001                                                     | 0.5949                                                         | 0.0029                                                    |
| Th17/Treg ratio                              | 2.1 (1.5–3.3)               | 0.2 (0.1–0.4)                                                               | 0.4 (0.3–0.5)      | 0.4 (0.1–0.6)      | <0.0001                                                     | 0.5949                                                         | 0.6794                                                    |
| Th17 polyfunc. (%) <sup>f</sup>              | 5.7 (3.6–7.5)               | 1.2 (0.5–2.8)                                                               | 1.3 (0.7–2.1)      | 1.1 (0.6–2.4)      | 0.0018                                                      | 0.5949                                                         | 0.8596                                                    |
| Ki67 <sup>+</sup> /CD4 <sup>+</sup> (%)      | 3.9 (3.2–4.9)               | 11.1 (5.5–20.6)                                                             | 7.6 (4.6–9.8)      | 5.0 (4.3–9.5)      | 0.0005                                                      | 0.0289                                                         | 0.8288                                                    |
| Ki67 <sup>+</sup> /CD8 <sup>+</sup> (%)      | 5.5 (3.5–6.9)               | 10.5 (6.0–22.2)                                                             | 6.0 (2.8–9.2)      | 4.3 (3.2–7.0)      | 0.0028                                                      | 0.0204                                                         | 0.002                                                     |
| <b>MLN</b>                                   |                             |                                                                             |                    |                    |                                                             |                                                                |                                                           |
| CD4 (%)                                      | 66.7 (52.7–69.1)            | N/A                                                                         | 62.5 (55.9–65.9)   | 68.7 (65.0–74.1)   | 0.0013                                                      | N/A                                                            | <0.0001                                                   |
| CD4/CD8 ratio                                | 2.4 (2.1–2.7)               | N/A                                                                         | 2.1 (1.8–2.2)      | 2.5 (2.0–3.2)      | 0.0797                                                      | N/A                                                            | 0.1815                                                    |
| Th17 (%)                                     | 2.2 (1.8–3.4)               | N/A                                                                         | 1.5 (0.8–1.8)      | 1.7 (0.99–2.9)     | 0.0129                                                      | N/A                                                            | 0.0139                                                    |
| Treg (%)                                     | 2.6 (1.7–3.4)               | N/A                                                                         | 2.8 (1.8–4.9)      | 4.1 (3.2–6.1)      | 0.3778                                                      | N/A                                                            | 0.0116                                                    |
| Th17/Treg ratio                              | 1.0 (0.8–1.6)               | N/A                                                                         | 0.6 (0.4–1.0)      | 0.4 (0.1–0.8)      | 0.0005                                                      | N/A                                                            | 0.0483                                                    |
| Ki67 <sup>+</sup> /CD4 <sup>+</sup> (%)      | 0.7 (0.6–0.8)               | N/A                                                                         | 1.8 (1.3–3.0)      | 1.7 (1.1–2.3)      | <0.0001                                                     | N/A                                                            | 0.6477                                                    |
| Ki67 <sup>+</sup> /CD8 <sup>+</sup> (%)      | 1.3 (1.0–1.4)               | N/A                                                                         | 3.3 (2.0–3.8)      | 2.5 (2.3–4.5)      | <0.0001                                                     | N/A                                                            | >0.9999                                                   |
| <b>PBMC</b>                                  |                             |                                                                             |                    |                    |                                                             |                                                                |                                                           |
| CM CD4 <sup>+</sup>                          | 9.9 (6.3–12.8)              | 6.7 (5.1–8.8)                                                               | 9.2 (6.2–11.3)     | 9.4 (8.2–11.7)     | 0.0230                                                      | 0.0616                                                         | 0.0062                                                    |
| TIGIT <sup>+</sup> CM CD4 <sup>+</sup>       | 4.5 (2.9–4.9)               | 7.5 (4.1–8.0)                                                               | 8.3 (6.9–11.7)     | 8.1 (6.0–9.1)      | 0.0034                                                      | 0.1688                                                         | 0.1336                                                    |
| TIGIT <sup>+</sup> CM CD8 <sup>+</sup>       | 3.4 (3.1–5.9)               | 6.4 (4.5–8.2)                                                               | 6.5 (5.3–8.8)      | 7.7 (5.3–11.2)     | 0.0071                                                      | 0.0602                                                         | 0.0304                                                    |

<sup>a</sup>Unadjusted paired Wilcoxon tests were used to generate *p*-values; *p* < 0.05 is considered significant.

<sup>b</sup>Baseline: 0 wpi (plasma); –4 wpi (blood, PBMC, colon, MLN).

<sup>c</sup>Acute infection: 6 wpi (plasma, colon, PBMC); 4 wpi (blood); N/A (MLN).

<sup>d</sup>2–4 Weeks post-cART: 2 weeks on cART (blood, PBMC, colon, MLN); 4 weeks on cART (plasma).

<sup>e</sup>22–26 Weeks post-cART: 22 weeks on cART [blood (CD4 count), PBMC, colon, MLN]; 26 weeks on cART [blood (CD4/CD8)].

<sup>f</sup>Th17 Polyfunc. (%): polyfunctional was defined as the percentage of cells expressing IL-17 and ≥2 additional cytokines (IL-22, IFN $\gamma$ , TNF $\alpha$ , or IL-2).

cART, combination antiretroviral therapy; CM, central memory; IL; IQR, interquartile range; MLN, mesenteric lymph node; N/A, not available; PBMC, peripheral blood mononuclear cells; polyfunc., polyfunctional; wpi, weeks post infection.
